# Supplementary material
Source: ML conference proceedings conference paper supplement (https://openreview.net/forum?id=rAGWvnpcKe)
Supplement: supplementary_material [file Appendix.pdf › Supplementary materials/Appendix.pdf]

# Appendix

## ArchCAD-400k: A Large-Scale CAD Drawings Dataset and New Baseline for Panoptic Symbol Spotting

### 1 A More Information About the ArchCAD-400k

#### 2 A.1 Detailed description of categorization

3 In Figure 1, we present some visual examples of content from each category. Engineering symbols  
4 from different categories can share great similarity. For example, simple rectangles can represent  
5 columns, holes, foundation, or furniture. Similarly, pairs of parallel lines might denote a pipeline,  
6 beam, or wall. At the same time, some instances can be drawn in diverse forms. As illustrated in  
7 Figure 1, there are at least six different ways to represent a door, and the appearance of stairs can vary  
greatly in different scenarios.

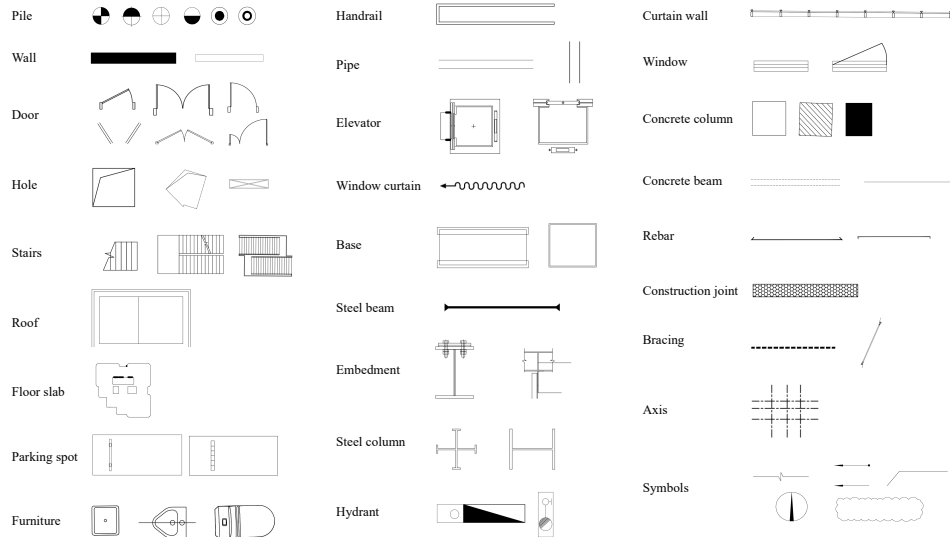

Figure 1: Visual examples of content in each category.

## 9 A.2 Additional information about the annotation pipeline

10 Our annotation pipeline adopts regex matching to map layer names to semantic classes. The layer  
 11 names in standardized drawings have a hierarchical format like [Discipline]-[Category]-[Modifier].  
 12 In Table 1, we list part of the standardized naming table for doors, walls, and stairs. Categories can  
 be matched through the keyword in the table.

Table 1: Examples of correspondence between layer names and semantics

| Semantic label | Standard layer specifications | Content description                                                          |
|----------------|-------------------------------|------------------------------------------------------------------------------|
| Door           | A-DOOR                        | The surface structure of the door.                                           |
|                | A-DOOR-FRAM                   | The internal steel frame supporting the door.                                |
|                | A-DOOR-HEAD                   | The line indicating the position of the door beam.                           |
|                | A-DOOR-ROLL                   | The layout or design of the fireproof roller shutter.                        |
|                | ...                           | ...                                                                          |
| Wall           | A-WALL-BLOK                   | Masonry block wall for structural stability.                                 |
|                | A-WALL-CONC                   | Concrete wall with high strength and fire resistance.                        |
|                | A-WALL-STUD                   | Lightweight partition with stud framing and drywall.                         |
|                | A-WALL-PRHT                   | Partial-height wall for spatial division.                                    |
|                | A-WALL-SCRN                   | Metal wall for electromagnetic shielding.                                    |
|                | A-WALL-FINI                   | Final surface treatment or cladding of a wall.                               |
|                | A-WALL-INSU                   | Insulation layer for thermal or acoustic performance.                        |
|                | A-WALL-TPTN                   | Partial-height wall for restroom privacy.                                    |
|                | A-WALL-EXPL                   | Reinforced wall to withstand blast pressures.                                |
|                | S-WALL-LINE                   | The outline or framework of a wall in structural drawings.                   |
| Stairs         | S-WALL-HATCH                  | Represents the filling or material pattern of a wall in structural drawings. |
|                | ...                           | ...                                                                          |
|                | A-STRS-TREA                   | Stepping surface and vertical connector in stair construction.               |
|                | A-STRS-ESCL                   | Mechanical moving stairs for vertical transportation between floors.         |
|                | A-STRS-HRAL                   | Safety rails along stair edges for fall prevention.                          |
| ...            | S-STRS-LINE                   | Outline representing stair geometry in structural drawings.                  |
|                | ...                           | ...                                                                          |

13

14 **A.3 Additional examples of ArchCAD-400k**

15 An example of well-labeled large architectural drawings exists in the main text. We further show two  
16 labeled drawings in our dataset in Figure 2. Each of them covers an area over 8000 m<sup>2</sup>, with various  
types of components.

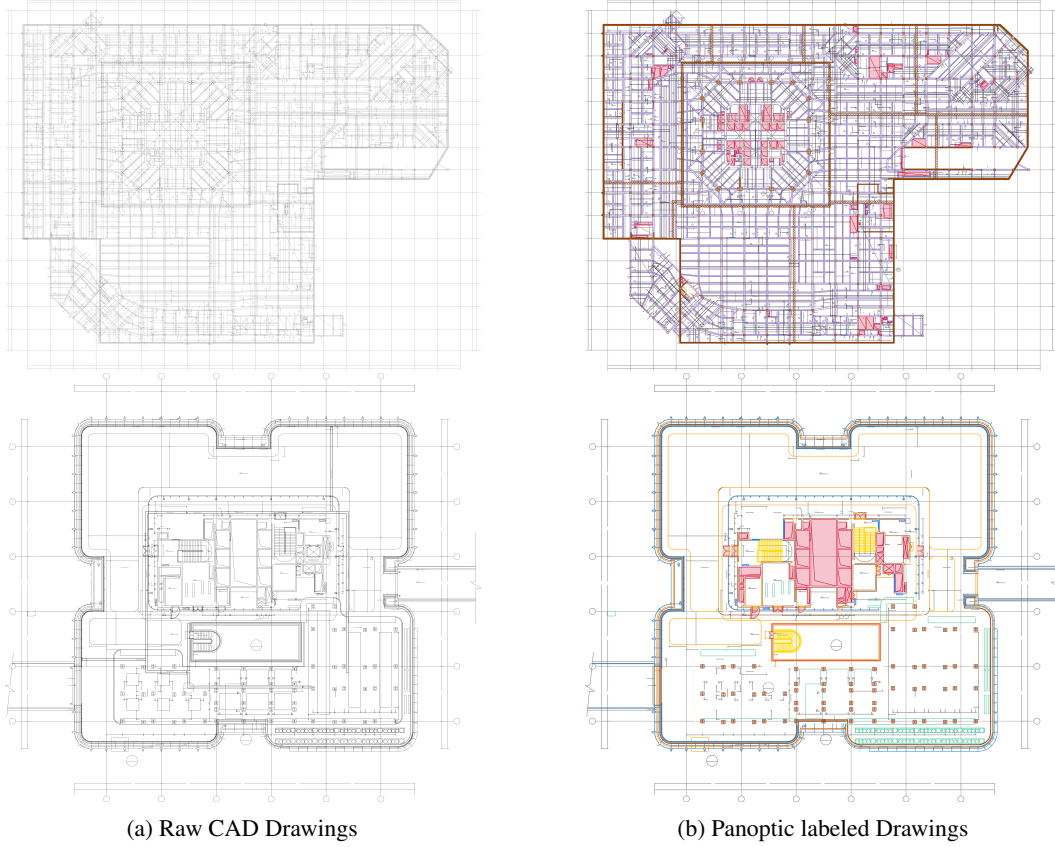

Figure 2: Additional example of the annotated drawings.

17

## 18 B More ablations and evaluations

### 19 B.1 Additional ablation studies on DPSS

20 To demonstrate the effectiveness of the proposed DPSS, we conducted ablation studies focusing  
21 on different encoding strategies. Specifically, we evaluated the impact of using only the primitive  
22 encoder, only the image encoder, and the combination of both, as shown in Table 2 (Lines 1–3). The  
23 integration of both the image encoder and the primitive encoder yields a 1.3% improvement in PQ  
24 compared to using the primitive encoder alone, and a 2.1% gain over using only the image encoder.  
25 These results highlight the complementary nature of the two encoding branches. Furthermore, we  
26 investigated the role of the adaptive fusion module by replacing it with a simple concatenation strategy  
27 for combining image and primitive features, as shown in Table 2 (Lines 3–4). The results show  
28 that incorporating our adaptive fusion leads to a significant 3.2% increase in PQ, underscoring its  
effectiveness in enhancing feature integration.

Table 2: Ablation experiments on FloorPlanCAD

| Primitive<br>Encoder | Image<br>Encoder | Adaptive<br>Fusion | PQ   | RQ   | SQ   |
|----------------------|------------------|--------------------|------|------|------|
| ✓                    |                  |                    | 81.7 | 90.1 | 90.6 |
|                      | ✓                |                    | 80.9 | 89.4 | 90.6 |
| ✓                    | ✓                |                    | 83.0 | 90.1 | 92.1 |
| ✓                    | ✓                | ✓                  | 86.2 | 93.0 | 92.6 |

29



## 30 B.2 Additional Quantitative Evaluations

31 We present the detailed experimental results of various methods on the ArchCAD-400k, including the  
 32 panoptic quality (PQ) for each category as well as the mean IoU (Intersection over Union) for each  
 33 category. The IoU for each category is obtained by calculating the intersection over union between  
 34 the predicted panoptic segmentation masks and the ground truth masks. Different methods excel  
 35 at handling different types of objects, DPSS achieves higher PQ and IoU metrics. For the current  
 36 spotting results, there is still significant room for improvement.

Table 3: Quantitative results for panoptic symbol spotting of each category on ArchCAD-400k

| class              | DPSS |       | CADTransformer [1] |      | SymPoint [2] |      | SymPointV2 [3] |      |
|--------------------|------|-------|--------------------|------|--------------|------|----------------|------|
|                    | IoU  | PQ    | IoU                | PQ   | IoU          | PQ   | IoU            | PQ   |
| symbol             | 84.4 | 89.8  | 62.4               | 70.7 | 76.4         | 80.9 | 74.2           | 79.3 |
| axis               | 90.8 | 85.4  | 23.2               | 32.9 | 58.3         | 56.2 | 71.8           | 83.7 |
| door               | 64.4 | 75.9  | 53.2               | 64.9 | 63.9         | 75.6 | 82.6           | 79.1 |
| floor slab         | 40.8 | 85.6  | 14.4               | 80.3 | 20.9         | 82.8 | 47.7           | 69.4 |
| elevator           | 45.6 | 77.6  | 26.5               | 63.9 | 54.6         | 73.3 | 28.0           | 69.2 |
| stairs             | 60.4 | 65.4  | 35.3               | 45.2 | 41.3         | 55.4 | 43.7           | 78.0 |
| furniture          | 72.5 | 88.7  | 66.5               | 73.3 | 63.2         | 83.9 | 43.4           | 54.0 |
| hole               | 61.1 | 70.2  | 32.1               | 40.0 | 59.6         | 53.8 | 50.2           | 60.7 |
| window             | 47.8 | 57.2  | 52.4               | 55.0 | 64.7         | 68.4 | 57.8           | 70.8 |
| curtain wall       | 65.9 | 83.7  | 48.8               | 61.4 | 50.3         | 72.6 | 33.9           | 39.1 |
| wall               | 73.4 | 75.6  | 39.1               | 45.9 | 52.7         | 57.7 | 42.3           | 70.7 |
| concrete column    | 65.8 | 83.6  | 59.5               | 66.8 | 64.4         | 71.6 | 63.9           | 69.8 |
| steel column       | 48.6 | 80.3  | 50.7               | 71.8 | 52.9         | 82.8 | 51.1           | 79.2 |
| concrete beam      | 81.8 | 81.7  | 43.8               | 45.0 | 61.5         | 62.1 | 48.3           | 77.9 |
| steel beam         | 79.1 | 73.0  | 19.7               | 34.9 | 47.5         | 52.2 | 71.5           | 77.4 |
| parking spot       | 66.8 | 73.2  | 57.9               | 76.9 | 46.0         | 79.3 | 72.1           | 69.0 |
| roof               | 3.5  | 28.7  | 3.7                | 39.1 | 5.7          | 50.1 | 55.6           | 76.1 |
| base               | 85.0 | 90.3  | 65.8               | 75.2 | 71.2         | 83.1 | 16.3           | 21.3 |
| bracing            | 19.6 | 33.8  | 7.8                | 20.0 | 20.2         | 23.2 | 67.6           | 81.1 |
| rebar              | 72.7 | 93.1  | 39.4               | 69.4 | 56.5         | 81.1 | 53.5           | 75.9 |
| equipment          | 37.2 | 45.8  | 1.0                | 7.0  | 30.8         | 31.8 | 28.4           | 29.1 |
| handrail           | 73.6 | 65.9  | 31.2               | 31.0 | 40.2         | 42.7 | 70.3           | 85.8 |
| pipe               | 44.4 | 48.3  | 32.9               | 34.4 | 51.7         | 41.7 | 52.5           | 42.4 |
| window curtain     | 50.4 | 80.3  | 58.6               | 72.1 | 49.2         | 67.7 | 46.3           | 47.5 |
| construction joint | 0.0  | 5.3   | 0.0                | 0.3  | 2.5          | 4.8  | 4.1            | 3.7  |
| embedment          | 0.0  | 0.0   | 0.0                | 0.0  | 0.0          | 0.0  | 1.2            | 2.8  |
| hydrant            | 70.7 | 71.7  | 68.6               | 64.5 | 74.1         | 69.4 | 49.5           | 34.0 |
| overall            | 70.6 | 67.04 | 47.6               | 49.1 | 60.5         | 59.1 | 60.0           | 60.8 |

37 **B.3 Additional Qualitative Evaluations**

38 Qualitative results on FloorPlanCAD [1] are shown in Figure 3, DPSS performs better despite the  
noise of the filler graphics and overlaps between instances.

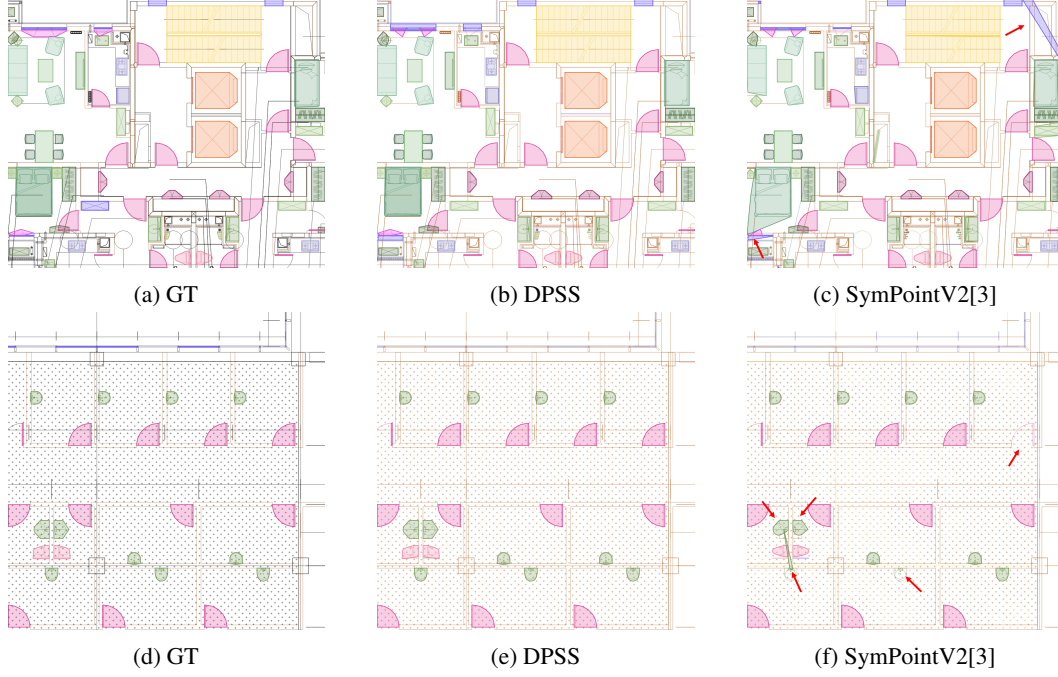

Figure 3: Additional qualitative comparison between DPSS and SymPointV2 on ArchCAD-400k. (a) and (d): Panoptic annotations. (b) and (e): Results from DPSS. (c) and (f): Results from SymPointV2.

## 40 C Limitations and Future Work

41 Although the proposed DPSS demonstrates strong performance on the panoptic symbol spotting task,  
42 some limitations remain. Notably, the current approach cannot process an entire vector drawing in a  
43 single pass, which leads to high computational overhead. With the availability of the ArchCAD-400k  
44 dataset, more complex and comprehensive research questions related to panoptic symbol spotting  
45 and the analysis of engineering line drawings can be explored. For example, future directions include  
46 the pre-trained models tailored for CAD vector graphics, and efficient inference strategies to handle  
47 large scale real-world drawings.

## 48 References

- 49 [1] Zhiwen Fan, Lingjie Zhu, Honghua Li, Xiaohao Chen, Siyu Zhu, and Ping Tan. Floorplancad: A  
50 large-scale cad drawing dataset for panoptic symbol spotting. In *Proceedings of the IEEE/CVF*  
51 *international conference on computer vision*, pages 10128–10137, 2021.
- 52 [2] Wenlong Liu, Tianyu Yang, Yuhan Wang, Qizhi Yu, and Lei Zhang. Symbol as points: Panoptic  
53 symbol spotting via point-based representation. *arXiv preprint arXiv:2401.10556*, 2024.
- 54 [3] Wenlong Liu, Tianyu Yang, Qizhi Yu, and Lei Zhang. Sympoint revolutionized: Boosting  
55 panoptic symbol spotting with layer feature enhancement. *arXiv preprint arXiv:2407.01928*,  
56 2024.
